# Supplementary material
Source: PubMed Central journal article supplement (PMC2708759)
Supplement: 0812998106_ST2_PDF.pdf [file 0812998106_ST2_PDF.pdf]

**Table S2. Corresponding GO IDs and GO terms for Figure S3.** All GO categories are presented in a hierarchical structure paralleling the DAG (directed acyclic graph) figure. In each row, the first number corresponds to “#” in Tables 2 and S3.

|    |            |                                      |                                                |                                                                       |
|----|------------|--------------------------------------|------------------------------------------------|-----------------------------------------------------------------------|
| BP | 1          | GO:0008152                           | <b>metabolic process</b>                       |                                                                       |
|    | 9          | GO:0009058                           | biosynthetic process                           |                                                                       |
|    |            | 24                                   | GO:0008610                                     | lipid biosynthetic process                                            |
|    |            | 25                                   | GO:0009059                                     | macromolecule biosynthetic process                                    |
|    |            | 48                                   | GO:0006412                                     | translation                                                           |
|    | 10         | GO:0044238                           | primary metabolic process                      |                                                                       |
|    |            | 26                                   | GO:0019538                                     | protein metabolic process                                             |
|    |            | 49                                   | GO:0006464                                     | protein modification process                                          |
|    |            | 63                                   | GO:0043687                                     | post-translational protein modification                               |
|    |            | 68                                   | GO:0006470                                     | protein amino acid dephosphorylation                                  |
|    |            | 27                                   | GO:0005975                                     | carbohydrate metabolic process                                        |
|    | 11         | GO:0006091                           | generation of precursor metabolites and energy |                                                                       |
|    |            | 28                                   | GO:0006118                                     | electron transport                                                    |
|    |            | 29                                   | GO:0006119                                     | oxidative phosphorylation                                             |
|    | 12         | GO:0043170                           | macromolecule metabolic process                |                                                                       |
|    |            | 30                                   | GO:0065003                                     | macromolecular complex assembly                                       |
|    | 13         | GO:0044237                           | cellular metabolic process                     |                                                                       |
|    |            | 31                                   | GO:0006139                                     | nucleobase, nucleoside, nucleotide and nucleic acid metabolic process |
|    |            | 50                                   | GO:0016070                                     | RNA metabolic process                                                 |
|    |            | 32                                   | GO:0006066                                     | alcohol metabolic process                                             |
|    | 2          | GO:0009987                           | <b>cellular process</b>                        |                                                                       |
|    |            | 14                                   | GO:0007154                                     | cell communication                                                    |
|    |            | 33                                   | GO:0007165                                     | signal transduction                                                   |
|    |            | 51                                   | GO:0007166                                     | cell surface receptor linked signal transduction                      |
|    | 64         | GO:0007219                           | Notch signaling pathway                        |                                                                       |
|    | 34         | GO:0007242                           | intracellular signaling cascade                |                                                                       |
|    | 52         | GO:0007243                           | protein kinase cascade                         |                                                                       |
|    | 65         | GO:0007249                           | I-kappaB kinase/NF-kappaB cascade              |                                                                       |
| 3  | GO:0051234 | <b>establishment of localization</b> |                                                |                                                                       |
|    | 15         | GO:0045184                           | establishment of protein localization          |                                                                       |
|    | 35         | GO:0015031                           | protein transport                              |                                                                       |

|    |            |                         |                                                                                    |                                                                 |
|----|------------|-------------------------|------------------------------------------------------------------------------------|-----------------------------------------------------------------|
| CC | 4          | GO:0043226              | <b>organelle</b>                                                                   |                                                                 |
|    | 16         | GO:0043227              | membrane-bounded organelle                                                         |                                                                 |
|    | 36         | GO:0043231              | intracellular membrane-bounded organelle                                           |                                                                 |
|    |            | <b>53</b>               | GO:0005739                                                                         | mitochondrion                                                   |
|    |            | <b>54</b>               | GO:0016023                                                                         | cytoplasmic membrane-bound vesicle                              |
|    | 17         | GO:0043228              | non-membrane-bounded organelle                                                     |                                                                 |
|    | 37         | GO:0043232              | intracellular non-membrane-bounded organelle                                       |                                                                 |
|    |            | <b>55</b>               | GO:0005840                                                                         | ribosome                                                        |
| MF | 5          | GO:0030528              | <b>transcriptional regulator activity</b>                                          |                                                                 |
|    |            | <b>18</b>               | GO:0003700                                                                         | transcription factor activity                                   |
|    | 6          | GO:0005215              | <b>transporter activity</b>                                                        |                                                                 |
|    | 19         | GO:0015075              | ion transmembrane transporter activity                                             |                                                                 |
|    |            | <b>38</b>               | GO:0005216                                                                         | ion channel activity                                            |
|    |            | 39                      | GO:0008324                                                                         | cation transmembrane transporter activity                       |
|    |            | 56                      | GO:0015077                                                                         | monovalent inorganic cation transmembrane transporter activity  |
|    |            | <b>66</b>               | GO:0015078                                                                         | hydrogen ion transporter activity                               |
|    | 7          | GO:0060089              | <b>molecular transducer activity</b>                                               |                                                                 |
|    | 20         | GO:0004871              | signal transducer activity                                                         |                                                                 |
|    |            | <b>40</b>               | GO:0004872                                                                         | receptor activity                                               |
|    | 8          | GO:0003824              | <b>catalytic activity</b>                                                          |                                                                 |
|    | 21         | GO:0016740              | transferase activity                                                               |                                                                 |
|    |            | 41                      | GO:0016772                                                                         | transferase activity, transferring phosphorus-containing groups |
|    |            | <b>57</b>               | GO:0016779                                                                         | nucleotidyltransferase activity                                 |
| 22 | GO:0016787 | hydrolase activity      |                                                                                    |                                                                 |
|    | <b>42</b>  | GO:0008233              | peptidase activity                                                                 |                                                                 |
|    | 43         | GO:0016818              | hydrolase activity, acting on acid anhydrides, in phosphorus-containing anhydrides |                                                                 |
|    | 58         | GO:0016462              | pyrophosphatase activity                                                           |                                                                 |
|    | 67         | GO:0017111              | nucleoside-triphosphatase activity                                                 |                                                                 |
|    | <b>69</b>  | GO:0003924              | GTPase activity                                                                    |                                                                 |
|    | 44         | GO:0016788              | hydrolase activity, acting on ester bonds                                          |                                                                 |
|    | <b>59</b>  | GO:0004518              | nuclease activity                                                                  |                                                                 |
| 23 | GO:0016491 | oxidoreductase activity |                                                                                    |                                                                 |
|    | 45         | GO:0016651              | oxidoreductase activity, acting on NADH or NADPH                                   |                                                                 |
|    | <b>60</b>  | GO:0003954              | NADH dehydrogenase activity                                                        |                                                                 |

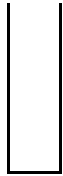

- 46 GO:0016675 oxidoreductase activity, acting on heme group of donors
- 61 GO:0004129 cytochrome-c oxidase activity
- 47 GO:0016679 oxidoreductase activity, acting on diphenols & related substances as donors
- 62 GO:0008121 ubiquinol-cytochrome-c reductase activity
