# Supplementary material
Source: PubMed Central journal article supplement (PMC2708759)
Supplement: 0812998106_ST3_PDF.pdf [file 0812998106_ST3_PDF.pdf]

**Table S3. Probes that contribute to “significant” GO terms in Figure S3 and Table S2.** Each probe shows significant regulation by itself (Fig. 3A) and contributes an overrepresented GO term in the analysis in Fig. S3 and Table S2. Row labels (“#”) correspond to the labels used in Fig. S3, Table 2 and Table S2, representing individual GO IDs and Terms. Individual probes are identified using the information for their orthologs in Gga Unigene.

| #  | GO ID      | GO TERM                         | GGA UNIGENE | NAME                                                          |
|----|------------|---------------------------------|-------------|---------------------------------------------------------------|
| 18 | GO:0003700 | transcription factor activity   | Gga.5777    | CREB3                                                         |
|    |            |                                 | Gga.39089   | E2F-3 transcription factor                                    |
|    |            |                                 | Gga.37843   | Fos-related antigen 2                                         |
|    |            |                                 | Gga.41307   | NR4A2                                                         |
|    |            |                                 | Gga.710     | nuclear factor I/A (NFIA)                                     |
|    |            |                                 | Gga.8709    | Proto-oncogene protein c-fos                                  |
|    |            |                                 | Gga.10531   | TEA domain family member 1                                    |
|    |            |                                 | Gga.1473    | Transcription factor AP-1                                     |
|    |            |                                 | Gga.4922    | ZENK                                                          |
| 24 | GO:0008610 | lipid biosynthetic process      | Gga.21297   | C-4 methylsterol oxidase                                      |
|    |            |                                 | Gga.19097   | Cytidine monophospho-N-acetylneuraminic acid synthetase       |
|    |            |                                 | Gga.22036   | geranylgeranyl diphosphate synthase                           |
|    |            |                                 | Gga.21304   | Phosphatidylserine synthase 2                                 |
| 27 | GO:0005975 | Carbohydrate metabolic process  | Gga.1383    | Alpha-enolase                                                 |
|    |            |                                 | Gga.16198   | alpha-L-fucosidase                                            |
|    |            |                                 | Gga.4132    | Gamma-enolase                                                 |
|    |            |                                 | Gga.34629   | GPD1 similar to MGC83663 protein                              |
| 30 | GO:0065003 | macromolecular complex assembly | Gga.14440   | adaptor-related protein complex AP-4 sigma4 subunit isoform 2 |
|    |            |                                 | Gga.2564    | AP1S2                                                         |
|    |            |                                 | Gga.4176    | Eukaryotic translation initiation factor 5A-2                 |
|    |            |                                 | Gga.11222   | exportin 5                                                    |
|    |            |                                 | Gga.41653   | Histone H1.10                                                 |
|    |            |                                 | Gga.39472   | histone H1x                                                   |
|    |            |                                 | Gga.4671    | Histone H2AV                                                  |
|    |            |                                 | Gga.15206   | IIB protein                                                   |
|    |            |                                 | Gga.11747   | MTIF3                                                         |
|    |            |                                 | Gga.34758   | NAP1L4                                                        |
|    |            |                                 | Gga.9705    | protein translation factor sui1 homolog                       |
|    |            |                                 | Gga.4597    | TAF13                                                         |
| 32 | GO:0006066 | alcohol metabolic process       | Gga.1383    | Alpha-enolase                                                 |
|    |            |                                 | Gga.21297   | C-4 methylsterol oxidase                                      |
|    |            |                                 | Gga.4132    | Gamma-enolase                                                 |
|    |            |                                 | Gga.34629   | GPD1 similar to MGC83663 protein                              |
| 35 | GO:0015031 | protein transport               | Gga.1878    | ARCN1, Coatomer subunit delta                                 |
|    |            |                                 | Gga.9521    | cell adhesion molecule with homology to L1CAM                 |
|    |            |                                 | Gga.2120    | clathrin heavy chain 1                                        |

|    |            |                      |           |                                                                         |
|----|------------|----------------------|-----------|-------------------------------------------------------------------------|
|    |            |                      | Gga.2486  | GTPase Rab8b                                                            |
|    |            |                      | Gga.16354 | Isoform 1 of Cysteine protease ATG4B                                    |
|    |            |                      | Gga.16047 | KPNA4                                                                   |
|    |            |                      | Gga.5744  | RAB30                                                                   |
|    |            |                      | Gga.26707 | Rab3A-interacting molecule                                              |
|    |            |                      | Gga.11578 | Rab-GDP dissociation inhibitor                                          |
|    |            |                      | Gga.16164 | Ras-related protein Rab-14                                              |
|    |            |                      | Gga.29996 | Ras-related protein Rab-2A                                              |
|    |            |                      | Gga.39466 | SCAMP5                                                                  |
|    |            |                      | Gga.16735 | signal transducing adaptor molecule (SH3 domain & ITAM motif) 2 (STAM2) |
|    |            |                      | Gga.21156 | SNX2                                                                    |
|    |            |                      | Gga.1782  | Vesicle-trafficking protein SEC22b                                      |
| 38 | GO:0005216 | ion channel activity | Gga.23850 | calcium channel, voltage-dependent, alpha 1H subunit                    |
|    |            |                      | Gga.30182 | T calcium channel alpha1G subunit                                       |
|    |            |                      | Gga.33    | Vanilloid receptor-like protein                                         |
|    |            |                      | Gga.5065  | voltage-gated potassium channel                                         |
| 40 | GO:0004872 | receptor activity    | Gga.21239 | Attractin precursor                                                     |
|    |            |                      | Gga.2305  | Chemokine receptor CXCR4                                                |
|    |            |                      | Gga.191   | growth hormone secretagogue receptor type 1a                            |
|    |            |                      | Gga.590   | mosaic protein LR11                                                     |
|    |            |                      | Gga.33742 | NR4A3                                                                   |
|    |            |                      | Gga.5306  | P2Y purinoceptor 1                                                      |
|    |            |                      | Gga.39787 | plexin B1 (PLXNB1)                                                      |
|    |            |                      | Gga.6091  | Progesterone receptor binding protein                                   |
| 42 | GO:0008233 | peptidase activity   | Gga.29367 | ADAM metallopeptidase with thrombospondin type 1 motif, 1               |
|    |            |                      | Gga.26865 | MMP24 protein                                                           |
|    |            |                      | Gga.2719  | Presenilin 2                                                            |
| 48 | GO:0006412 | translation          | Gga.9830  | mitochondrial ribosomal protein L16 (L16mt)                             |
|    |            |                      | Gga.23322 | PET112-like                                                             |
|    |            |                      | Gga.31405 | activin receptor-like kinase 7                                          |
|    |            |                      | Gga.1138  | Alanyl-tRNA synthetase                                                  |
|    |            |                      | Gga.22440 | Alanyl-tRNA synthetase 2, mitochondrial (putative)                      |
|    |            |                      | Gga.24680 | capacitative calcium entry channel 2                                    |
|    |            |                      | Gga.40011 | CGI-134 protein                                                         |
|    |            |                      | Gga.39783 | Copine II                                                               |
|    |            |                      | Gga.10406 | Cylindromatosis                                                         |
|    |            |                      | Gga.22936 | Cysteinyl-tRNA synthetase                                               |
|    |            |                      | Gga.25612 | DNA polymerase gamma accessory subunit                                  |
|    |            |                      | Gga.21991 | Eukaryotic translation initiation factor 2, subunit 1 alpha, 35kDa      |

|           |                                                                           |
|-----------|---------------------------------------------------------------------------|
| Gga.9474  | Eukaryotic translation initiation factor 2, subunit 3 gamma, 52kDa        |
| Gga.4804  | Eukaryotic translation initiation factor 3, subunit 6 48kDa               |
| Gga.22792 | Eukaryotic translation initiation factor 3, subunit 6 interacting protein |
| Gga.4580  | Eukaryotic translation initiation factor 4A, isoform 2                    |
| Gga.6351  | G1 to S phase transition 1                                                |
| Gga.11968 | Glutaminyl-tRNA synthase (glutamine-hydrolyzing)-like 1                   |
| Gga.39342 | GUF1 GTPase homolog ( <i>S. cerevisiae</i> )                              |
| Gga.39121 | ribosomal protein L33-like protein                                        |
| Gga.9294  | IMP3, U3 small nucleolar ribonucleoprotein, homolog (yeast)               |
| Gga.34338 | Jun-binding protein                                                       |
| Gga.22522 | Mitochondrial 28S ribosomal protein S2 (MRP-S2) (CGI-91)                  |
| Gga.5347  | Mitochondrial 28S ribosomal protein S6 (MRP-S6)                           |
| Gga.15711 | Mitochondrial methionyl-tRNA formyltransferase                            |
| Gga.5269  | Mitochondrial ribosomal protein L13                                       |
| Gga.7129  | Mitochondrial ribosomal protein L15                                       |
| Gga.9754  | Mitochondrial ribosomal protein L19                                       |
| Gga.16064 | Mitochondrial ribosomal protein L2                                        |
| Gga.1889  | Mitochondrial ribosomal protein L22                                       |
| Gga.3524  | Mitochondrial ribosomal protein L27                                       |
| Gga.22329 | Mitochondrial ribosomal protein L3                                        |
| Gga.2854  | Mitochondrial ribosomal protein L32                                       |
| Gga.11336 | Mitochondrial ribosomal protein L47                                       |
| Gga.7866  | Mitochondrial ribosomal protein L48                                       |
| Gga.5818  | Mitochondrial ribosomal protein L51                                       |
| Gga.9224  | Mitochondrial ribosomal protein S10                                       |
| Gga.20084 | Mitochondrial ribosomal protein S11                                       |
| Gga.7179  | Mitochondrial ribosomal protein S18A                                      |
| Gga.40139 | Mitochondrial ribosomal protein S30                                       |
| Gga.11813 | Mitochondrial ribosomal protein S7                                        |
| Gga.8050  | Mitochondrial ribosomal protein S9                                        |
| Gga.29921 | oligomeric golgi complex 8                                                |
| Gga.463   | p52 pro-apototic protein                                                  |
| Gga.2429  | PCI domain containing 1 (herpesvirus entry mediator)                      |
| Gga.22260 | Pelota homolog ( <i>Drosophila</i> )                                      |
| Gga.41560 | peptidylarginine deiminase                                                |
| Gga.6269  | Phenylalanyl-tRNA synthetase, beta subunit                                |
| Gga.41764 | rat ribosomal protein L9 homologue                                        |

|           |                              |
|-----------|------------------------------|
| Gga.4632  | Ribosomal protein L10a       |
| Gga.4687  | Ribosomal protein L11        |
| Gga.4040  | Ribosomal protein L13        |
| Gga.81    | Ribosomal protein L14        |
| Gga.7049  | Ribosomal protein L15        |
| Gga.4385  | Ribosomal protein L17        |
| Gga.4729  | Ribosomal protein L18a       |
| Gga.4674  | Ribosomal protein L19        |
| Gga.4572  | Ribosomal protein L21        |
| Gga.9333  | Ribosomal protein L22        |
| Gga.31637 | Ribosomal protein L26-like 1 |
| Gga.743   | Ribosomal protein L27        |
| Gga.1799  | ribosomal protein L29        |
| Gga.39389 | ribosomal protein L3         |
| Gga.990   | Ribosomal protein L3         |
| Gga.39758 | ribosomal protein L30        |
| Gga.9375  | Ribosomal protein L30        |
| Gga.4657  | Ribosomal protein L31        |
| Gga.4539  | Ribosomal protein L34        |
| Gga.39147 | Ribosomal protein L35        |
| Gga.4459  | Ribosomal protein L35a       |
| Gga.80    | Ribosomal protein L36        |
| Gga.37090 | Ribosomal protein L37a       |
| Gga.1372  | Ribosomal protein L39        |
| Gga.11382 | Ribosomal protein L3-like    |
| Gga.4523  | Ribosomal protein L4         |
| Gga.4962  | Ribosomal protein L5         |
| Gga.3486  | Ribosomal protein L6         |
| Gga.4878  | Ribosomal protein L7         |
| Gga.4080  | Ribosomal protein L7a        |
| Gga.1988  | Ribosomal protein L7-like 1  |
| Gga.34288 | Ribosomal protein L8         |
| Gga.4776  | Ribosomal protein L9         |
| Gga.19060 | Ribosomal protein S11        |
| Gga.6575  | Ribosomal protein S12        |
| Gga.21141 | Ribosomal protein S13        |
| Gga.4512  | Ribosomal protein S14        |
| Gga.991   | Ribosomal protein S15        |
| Gga.34434 | ribosomal protein S15        |
| Gga.5153  | Ribosomal protein S17        |
| Gga.34636 | Ribosomal protein S20        |
| Gga.3877  | Ribosomal protein S24        |
| Gga.39015 | Ribosomal protein S27a       |

|    |            |                                    |           |                                                                    |
|----|------------|------------------------------------|-----------|--------------------------------------------------------------------|
|    |            |                                    | Gga.5571  | Ribosomal protein S27-like                                         |
|    |            |                                    | Gga.39035 | ribosomal protein S28                                              |
|    |            |                                    | Gga.34333 | Ribosomal protein S3                                               |
|    |            |                                    | Gga.4045  | Ribosomal protein S4                                               |
|    |            |                                    | Gga.4389  | Ribosomal protein S6                                               |
|    |            |                                    | Gga.4686  | Ribosomal protein S7                                               |
|    |            |                                    | Gga.34355 | Ribosomal protein SA                                               |
|    |            |                                    | Gga.39010 | Rps16 protein                                                      |
|    |            |                                    | Gga.12123 | Similar to putative BRCA1-interacting protein                      |
|    |            |                                    | Gga.39445 | tax-responsive element binding protein 107                         |
|    |            |                                    | Gga.13695 | Transient receptor potential cation channel, subfamily C, member 4 |
|    |            |                                    | Gga.569   | Ubiquitin A-52 residue ribosomal protein fusion product 1          |
|    |            |                                    | Gga.4516  | yeast ribosomal protein S28 homologue                              |
| 50 | GO:0016070 | RNA metabolic process              | Gga.5777  | CREB3                                                              |
|    |            |                                    | Gga.39089 | E2F-3 transcription factor                                         |
|    |            |                                    | Gga.37843 | Fos-related antigen 2                                              |
|    |            |                                    | Gga.4638  | High mobility group 1 protein                                      |
|    |            |                                    | Gga.15745 | polyribonucleotide nucleotidyltransferase 1 (PNPT1)                |
|    |            |                                    | Gga.8709  | v-fos FBJ murine osteosarcoma viral oncogene homolog (FOS)         |
|    |            |                                    | Gga.4922  | ZENK                                                               |
| 54 | GO:0016023 | cytoplasmic membrane-bound vesicle | Gga.12184 | N-methyl-D-aspartate receptor type 1 subunit                       |
|    |            |                                    | Gga.2120  | clathrin heavy chain 1                                             |
|    |            |                                    | Gga.2500  | Ras-related protein Rab-5C                                         |
|    |            |                                    | Gga.2564  | AP1S2                                                              |
|    |            |                                    | Gga.30013 | synaptotagmin IV                                                   |
|    |            |                                    | Gga.30078 | SYT17                                                              |
|    |            |                                    | Gga.31198 | synaptotagmin XV-a                                                 |
|    |            |                                    | Gga.8934  | SEC24C                                                             |
|    |            |                                    | Gga.948   | aczonin                                                            |
| 57 | GO:0016779 | Nucleotidyl-transferase activity   | Gga.2135  | DNA polymerase gamma                                               |
|    |            |                                    | Gga.4316  | Poly(A) polymerase alpha                                           |
|    |            |                                    | Gga.10727 | bifunctional ATP sulfurylase/adenosine 5-phosphosulfate kinase     |
|    |            |                                    | Gga.41355 | CDP-diacylglycerol synthase 1                                      |
|    |            |                                    | Gga.22829 | DNA primase (subunit p48)                                          |
|    |            |                                    | Gga.9810  | GMPPB                                                              |
|    |            |                                    | Gga.28477 | PAP associated domain containing 5                                 |
|    |            |                                    | Gga.27789 | POLR1E                                                             |
|    |            |                                    | Gga.4766  | POLR2D                                                             |
|    |            |                                    | Gga.34330 | Polymerase (RNA) II (DNA directed) polypeptide E                   |

|    |            |                                      |           |                                                     |
|----|------------|--------------------------------------|-----------|-----------------------------------------------------|
|    |            |                                      | Gga.15745 | polyribonucleotide nucleotidyltransferase 1 (PNPT1) |
|    |            |                                      | Gga.7853  | REV7                                                |
|    |            |                                      | Gga.14796 | RNase H, putative                                   |
|    |            |                                      | Gga.30542 | TWIST neighbor                                      |
| 59 | GO:0004518 | nuclease activity                    | Gga.15745 | polyribonucleotide nucleotidyltransferase 1 (PNPT1) |
|    |            |                                      | Gga.3122  | REXO2                                               |
| 64 | GO:0007219 | Notch signaling pathway              | Gga.2894  | jagged 1 (Alagille syndrome) (JAG1)                 |
|    |            |                                      | Gga.2719  | Presenilin 2                                        |
| 65 | GO:0007249 | I-kappaB kinase/NF-kappaB cascade    | Gga.39064 | GTPase cRhoA                                        |
|    |            |                                      | Gga.14435 | Ubiquitin carrier protein                           |
| 68 | GO:0006470 | protein amino acid dephosphorylation | Gga.2977  | protein tyrosine phosphatase, receptor-type, zeta1  |
|    |            |                                      | Gga.2675  | protein-tyrosine phosphatase CRYPalpha              |
| 69 | GO:0003924 | GTPase activity                      | Gga.31842 | dynamamin 1 isoform 1                               |
|    |            |                                      | Gga.3921  | eukaryotic translation initiation factor 5B         |
|    |            |                                      | Gga.39395 | GSPT1 protein                                       |
|    |            |                                      | Gga.26345 | GTPBP2                                              |
|    |            |                                      | Gga.35012 | TUBA1C                                              |
|    |            |                                      | Gga.39460 | Tubulin alpha-1 chain                               |
