# Supplementary material
Source: PubMed Central journal article supplement (PMC2708759)
Supplement: 0812998106_ST4_PDF.pdf [file 0812998106_ST4_PDF.pdf]

**Table S4.** Summary of array results for electron transport chain components. The table represents all probes on the array that are annotated to components of mitochondrial Complexes I-V. Where more than one probe is annotated to the same gene, the number of these is shown in the “probe” column. Where two numbers are given under “probe,” the first number indicates how many showed a statistically significant change in the Habituated group relative to Silence (FDR adjusted p value < 0.05). The “fold” column shows the mean fold change for that group of probes in Habituated relative to Silence, where that change is statistically significant (in the few cases where probes annotated to the same transcript did not change in the same way, only the significant changes were considered). A blank under “fold” indicates no significant change.

| <b>Gene Symbol</b>               | <b>IPI ID</b> | <b>Probe</b> | <b>Fold</b> |
|----------------------------------|---------------|--------------|-------------|
| <b>Mitochondrial Complex I</b>   |               |              |             |
| NDUFA5                           | IPI00593376   |              |             |
| NDUFA7                           | IPI00593572   | 2            | -0.11       |
| NDUFA12                          | IPI00813787   |              | -0.42       |
| NDUFB1                           | IPI00595929   |              | -0.38       |
| NDUFB3                           | IPI00571772   |              | -0.23       |
| NDUFB4                           | IPI00812364   | 2            | -0.26       |
| NDUFB8                           | IPI00682372   |              | -0.27       |
| NDUFC2                           | IPI00595541   |              |             |
| NDUFS1                           | IPI00592304   | 2            |             |
| NDUFS3                           | IPI00572839   | 1/2          | -0.14       |
| NDUFS7                           | IPI00602158   |              |             |
| NDUFS8                           | IPI00574901   | 3            |             |
| NDUFV1                           | IPI00604046   | 1/2          | -0.17       |
| NDUFV2                           | IPI00571196   |              | -0.31       |
| <b>Mitochondrial Complex II</b>  |               |              |             |
| SDHA                             | IPI00593756   | 1/2          | 0.12        |
| SDHB                             | IPI00580009   |              | -0.16       |
| SDHD                             | IPI00580676   | 2            | -0.18       |
| <b>Mitochondrial Complex III</b> |               |              |             |
| UQCRRS1                          | IPI00571043   |              | -0.19       |
| UQCRB                            | IPI00573776   |              | -0.42       |
| UQCR/QCR10                       | IPI00577906   |              | -0.38       |
| UQCRX/QCR9                       | IPI00586729   |              | -0.39       |
| UQCRQ/QCR8                       | IPI00597355   | 2            | -0.32       |
| UQCRH                            | IPI00813155   | 2            | -0.28       |
| <b>Mitochondrial Complex IV</b>  |               |              |             |
| COX4                             | IPI00576496   |              |             |
| COX5A                            | IPI00681768   | 2            | -0.15       |
| COX6A1                           | IPI00583550   | 2            | -0.32       |
| COX6B                            | IPI00591002   |              | -0.21       |
| COX6C                            | IPI00584699   |              | -0.49       |
| COX7A2                           | IPI00596884   |              | -0.46       |
| COX7a2L                          | IPI00579138   |              | -0.25       |
| COX7B                            | IPI00681435   | 2            |             |

|                                |             |     |       |
|--------------------------------|-------------|-----|-------|
| COX7C                          | IPI00581322 |     | -0.34 |
| COX8                           | IPI00598468 |     |       |
| SURF1                          | IPI00571267 |     |       |
| <b>Mitochondrial Complex V</b> |             |     |       |
| ATP5A1                         | IPI00823124 | 4   |       |
| ATP5F1                         | IPI00570686 | 2   |       |
| ATP5G1                         | IPI00811547 |     |       |
| ATP5G3                         | IPI00593935 | 5/6 | -0.24 |
| ATP5H                          | IPI00594088 | 2   |       |
| ATP5I                          | IPI00576667 |     | -0.11 |
| ATP5J                          | IPI00588938 | 1/2 | -0.36 |
| ATP5L                          | IPI00593214 |     |       |
| ATP5O                          | IPI00813389 |     | -0.27 |
| ATP6V0B                        | IPI00590995 | 2   | -0.28 |
| ATP6V0C                        | IPI00597834 |     |       |
| ATP6V0D1                       | IPI00591538 |     |       |
| ATP6V0E1                       | IPI00583630 |     | -0.27 |
| ATP6V0E2                       | IPI00810618 | 2   |       |
| ATP6V1A                        | IPI00822345 | 1/3 | 0.29  |
| ATP6V1B2                       | IPI00584789 |     |       |
| ATP6V1C                        | IPI00579791 |     |       |
| ATP6V1D                        | IPI00580182 | 2   | 0.17  |
| ATP6V1E1                       | IPI00583177 |     | -0.21 |
| ATP6V1H                        | IPI00593252 |     |       |
| ATPB                           | IPI00584049 | 2   |       |
| V-ATPase S1                    | IPI00590023 | 2   |       |
