# Supplementary material
Source: PubMed Central journal article supplement (PMC2708759)
Supplement: 0812998106_ST5_PDF.pdf [file 0812998106_ST5_PDF.pdf]

| Spot Number | Accession Number (GI) | Mascot Score | Molecular Weight | Protein Name                                  | Change-<br>Novel | Change-<br>Habituated | Mitochondria | Biosynthesis<br>Process | Energy<br>Metabolism |
|-------------|-----------------------|--------------|------------------|-----------------------------------------------|------------------|-----------------------|--------------|-------------------------|----------------------|
| 1023        | 211235                | 483          | 42080            | • Creatine kinase, brain                      | ▲▲               |                       | +            | +                       |                      |
| 942         | 211235                | 273          | 44414            | • Creatine kinase, brain                      | ▲▲               |                       | +            | +                       |                      |
| 649         | 60592998              | 350          | 56150            | • 3-Oxoacid CoA transferase 1                 | ▲▲               |                       | +            | +                       |                      |
| 646         | 60592998              | 420          | 56150            | • 3-Oxoacid CoA transferase 1                 | ▲                |                       | +            | +                       |                      |
| 1112        | 226855                | 404          | 38624            | • Aldolase C                                  | ▲▲               |                       | +            | +                       |                      |
| 1085        | 226855                | 356          | 38624            | • Aldolase C                                  | ▲                |                       | +            | +                       |                      |
| 1300        | 50754481              | 137          | 37360            | Pyruvate dehydrogenase (lipoamide) beta       | ▲                |                       | +            | +                       |                      |
| 691         | 8163560               | 775          | 55015            | Vacuolar ATP synthase subunit B               | ▼▼               |                       | +            |                         | +                    |
| 1487        | 45382251              | 125          | 26184            | Ubiquitin carboxyl-terminal esterase L3       | ▼▼               |                       |              |                         |                      |
| 808         | 45384010              | 284          | 41738            | Actin, gamma-enteric smooth muscle            | ▼▼               |                       |              |                         |                      |
| 974         | 45382927              | 534          | 42080            | Actin, beta                                   | ▼                |                       |              |                         |                      |
| 1450        | 3851612               | 118          | 33374            | Succinate dehydrogenase Ip subunit            | ▼▼▼              |                       | +            |                         | +                    |
| 854         | 118098116             | 81           | 57258            | 4-Aminobutyrate aminotransferase              | ▼▼▼              |                       | +            | +                       |                      |
| 696         | 45383566              | 565          | 60263            | • ATP synthase subunit alpha                  | ▼▼▼              |                       | +            |                         | +                    |
| 690         | 45383566              | 395          | 42262            | • ATP synthase subunit alpha                  | ▼▼▼              |                       | +            |                         | +                    |
| 1574        | 118093103             | 163          | 28017            | • similar to Prdx3 protein                    | ▼▼▼              |                       | +            |                         |                      |
| 1571        | 118093103             | 209          | 28304            | • similar to Prdx3 protein                    |                  | ▲▲                    | +            |                         |                      |
| 1185        | 50753625              | 66           | 24394            | similar to Neuronal calcium binding protein 2 |                  | ▲▲                    |              |                         |                      |
| 654         | 60592998              | 316          | 56150            | • 3-Oxoacid CoA transferase 1                 |                  | ▼▼                    | +            | +                       |                      |
| 331         | 119331078             | 508          | 77697            | Dynamin 1-like                                |                  | ▼▼                    | +            |                         |                      |
| 1156        | 57529654              | 206          | 37053            | Aldo-keto reductase family 1, member A1       |                  | ▼▼                    |              | +                       |                      |
| 348         | 57529753              | 751          | 79526            | NADH-ubiquinone oxidoreductase, 75 kDa        |                  | ▼▼                    | +            |                         | +                    |
| 922         | 46048768              | 282          | 47617            | Alpha-enolase                                 |                  | ▼                     |              | +                       |                      |
| 1254        | 71895681              | 133          | 36714            | Electron transfer flavoprotein alpha polypept |                  | ▼                     | +            |                         |                      |

**Table S5. Annotated protein spots from DIGE experiment**, identified by MS/MS sequencing (*Supporting Information*). Triangles (black up, white down) point direction of change relative to Silence (two triangles =  $p < .05$ ; one =  $p < 0.1$ ). Plusses (+) indicate GO terms from annotation of orthologous chicken proteins. Bullets (•) indicate same protein detected in multiple spots.
