# Supplementary material
Source: PubMed Central journal article supplement (PMC2708759)
Supplement: 0812998106_ST6_PDF.pdf [file 0812998106_ST6_PDF.pdf]

**Table S6.** Comparison of regulated gene list from Wada et al, Supporting Table 6 (20) with data for corresponding probes from the present study. To identify corresponding probes, gene names in the Wada table were searched against Unigene and Ensembl databases and matched to annotations for the 20K array (7) used in the present study. # probes: the number of independent probes associated with each gene target on each array. 20K ID: the internal identifier for the spot on the 20K array (7). ANOVA p (FDR) and columns to the right: the statistics from the primary microarray analysis described in the main text of the present report. Where multiple probes on the 20K array match to the same gene name, the values for the single probe with the lowest ANOVA p-value is given.

| Probe name<br>(Wada) | # probes<br>(Wada) | # probes<br>(20K) | 20K ID          | ANOVA<br>p (FDR) | Novel:<br>Silence<br>ratio | p<br>(FDR) | Habit:<br>Silence<br>ratio | p<br>(FDR) | Habit:<br>Novel<br>ratio | p<br>(FDR) |
|----------------------|--------------------|-------------------|-----------------|------------------|----------------------------|------------|----------------------------|------------|--------------------------|------------|
| Arc                  | 1                  | 1                 | Arc             | 0.09             | 1.47                       | 0.15       | 1.44                       | 0.09       | 0.98                     | 0.94       |
| <b>ARHGEF9</b>       | 3                  | 3                 | SB02031A1F02.f1 | 0.00             | 0.96                       | 0.65       | 1.28                       | 0.00       | 1.33                     | 0.00       |
| <b>Atf4</b>          | 14                 | 1                 | SB02006A1F01.f1 | 0.00             | 0.95                       | 0.42       | 0.75                       | 0.00       | 0.79                     | 0.00       |
| <b>Atp6v1b2</b>      | 10                 | 2                 | SB02014A1H09.f2 | 0.00             | 1.10                       | 0.29       | 0.84                       | 0.02       | 0.77                     | 0.00       |
| BDNF                 | 1                  | 1                 | SB02036A1C10.f1 | 0.33             | 1.23                       | 0.34       | 1.04                       | 0.85       | 0.85                     | 0.33       |
| beta actin           | 3                  | 1                 | SB02028A1F09.f1 | 0.38             | 1.06                       | 0.43       | 1.06                       | 0.33       | 1.00                     | 1.00       |
| <b>Cacybp</b>        | 12                 | 1                 | SB02025A2E12.f1 | 0.02             | 1.10                       | 0.38       | 0.85                       | 0.08       | 0.77                     | 0.01       |
| <b>c-fos</b>         | 4                  | 2                 | SB03001B2H03.f1 | 0.00             | 2.56                       | 0.00       | 1.89                       | 0.00       | 0.74                     | 0.04       |
| <b>c-jun</b>         | 10                 | 1                 | SB03033B1G05.f1 | 0.02             | 1.48                       | 0.04       | 1.14                       | 0.39       | 0.77                     | 0.08       |
| Ebag9                | 5                  | 1                 | SB03027B2G08.f1 | 0.16             | 1.03                       | 0.87       | 0.84                       | 0.19       | 0.82                     | 0.11       |
| <b>egr1</b>          | 1                  | 7                 | SB03008A1H11.f1 | 0.00             | 1.78                       | 0.00       | 1.44                       | 0.00       | 0.81                     | 0.03       |
| <b>Gadd45 beta</b>   | 1                  | 4                 | SB03036A2A04.f1 | 0.01             | 1.04                       | 0.58       | 0.87                       | 0.02       | 0.84                     | 0.00       |
| H2AfX                | 10                 | 0                 | –               |                  |                            |            |                            |            |                          |            |
| <b>H3f3B</b>         | 11                 | 2                 | SB02025B2G12.f1 | 0.00             | 1.10                       | 0.16       | 0.79                       | 0.00       | 0.72                     | 0.00       |
| <b>HnrpH3</b>        | 6                  | 1                 | SB02029B2B02.f1 | 0.02             | 1.03                       | 0.71       | 0.89                       | 0.05       | 0.86                     | 0.02       |
| Hsp25                | 13                 | 1                 | SB03005B2B04.f1 | 0.45             | 1.04                       | 0.51       | 1.05                       | 0.36       | 1.01                     | 0.94       |
| <b>Hsp40</b>         | 3                  | 1                 | SB03036B2C12.f1 | 0.05             | 1.23                       | 0.19       | 0.92                       | 0.58       | 0.75                     | 0.03       |
| <b>Hsp70-8</b>       | 20                 | 2                 | SB03037B2H05.f1 | 0.06             | 1.17                       | 0.18       | 1.21                       | 0.04       | 1.04                     | 0.71       |
| Hsp90 alpha          | 32                 | 1                 | SB02022A1B11.f1 | 0.58             | 0.99                       | 0.97       | 0.91                       | 0.47       | 0.92                     | 0.49       |
| Hspb1                | 2                  | 0                 | –               |                  |                            |            |                            |            |                          |            |
| JSC                  | 8                  | 1                 | SB03044A2H07.f1 | 0.48             | 0.98                       | 0.92       | 0.89                       | 0.37       | 0.91                     | 0.44       |
| Madh2                | 1                  | 1                 | SB03023A1F04.f1 | 0.39             | 0.93                       | 0.39       | 0.95                       | 0.42       | 1.02                     | 0.84       |
| Ndufa5               | 2                  | 1                 | SB03013B1H11.f1 | 0.85             | 0.98                       | 0.83       | 1.01                       | 0.93       | 1.02                     | 0.69       |
| Penk                 | 2                  | 2                 | SB020001000D07  | 0.19             | 1.09                       | 0.86       | 0.68                       | 0.22       | 0.63                     | 0.13       |
| <b>Prkar1 alpha</b>  | 2                  | 1                 | SB02012B1C10.f1 | 0.01             | 0.97                       | 0.80       | 1.25                       | 0.02       | 1.30                     | 0.01       |
| <b>Shfdg1</b>        | 3                  | 1                 | SB010012000C02  | 0.00             | 0.99                       | 0.92       | 0.65                       | 0.00       | 0.66                     | 0.00       |
| sim Fmnl             | 1                  | 1                 | SB02014B1D05.f1 | 0.73             | 0.96                       | 0.73       | 1.01                       | 0.93       | 1.05                     | 0.56       |
| sim junB             | 1                  | 0                 | –               |                  |                            |            |                            |            |                          |            |
| <b>sim NPDP014</b>   | 8                  | 4                 | SB02009A2B02.f1 | 0.03             | 1.02                       | 0.65       | 0.94                       | 0.06       | 0.92                     | 0.02       |
| Stard7               | 4                  | 0                 | –               |                  |                            |            |                            |            |                          |            |
| <b>Syt4</b>          | 1                  | 2                 | SB03050B1D10.f1 | 0.00             | 1.11                       | 0.43       | 1.43                       | 0.00       | 1.29                     | 0.02       |
| <b>Tagln2</b>        | 1                  | 4                 | SB02004B1A07.f1 | 0.00             | 1.11                       | 0.47       | 0.75                       | 0.02       | 0.67                     | 0.00       |
| <b>UbE2v1</b>        | 2                  | 1                 | SB02046B1B08.f1 | 0.01             | 1.12                       | 0.30       | 0.84                       | 0.04       | 0.75                     | 0.00       |
